# Supplementary material
Source: PubMed Central journal article supplement (PMC5874401)
Supplement: JVI.00146-18_zjv008183480s1.pdf [file JVI.00146-18_zjv008183480s1.pdf]

# A polyamide inhibits replication of vesicular stomatitis virus by targeting RNA in the nucleocapsid

Ryan H Gumper<sup>a,b</sup>, Weike Li<sup>a</sup>, Carlos H Castaneda<sup>c</sup>, Maria J Scuderi<sup>c</sup>, James K Bashkin<sup>c</sup>, and Ming Luo<sup>a,d,\*</sup>

(Running title: Antiviral polyamide against NSV)

<sup>a</sup>Department of Chemistry, Georgia State University, Atlanta, GA 30302, USA

<sup>b</sup>Molecular Basis of Disease, Georgia State University, Atlanta, GA 30302, USA

<sup>c</sup>Department of Chemistry & Biochemistry, Center for Nanoscience, University of Missouri-St Louis, 1 University Blvd, St Louis, MO 63121, USA

<sup>d</sup>Center for Diagnostics and Therapeutics, Georgia State University, Atlanta, GA 30302, USA

**Table S1  $2^{-\Delta\Delta C_T}$  Values for Minigenome**

| <b>Comparison:</b>                 | <b><math>2^{-\Delta\Delta C_T}</math></b> |
|------------------------------------|-------------------------------------------|
| <b>UMSL1011:DMSO(control)</b>      | <b>0.33</b>                               |
| <b>DMSO(control):Mock(control)</b> | <b>0.88</b>                               |
| <b>UMSL1011:Mock(control)</b>      | <b>0.29</b>                               |

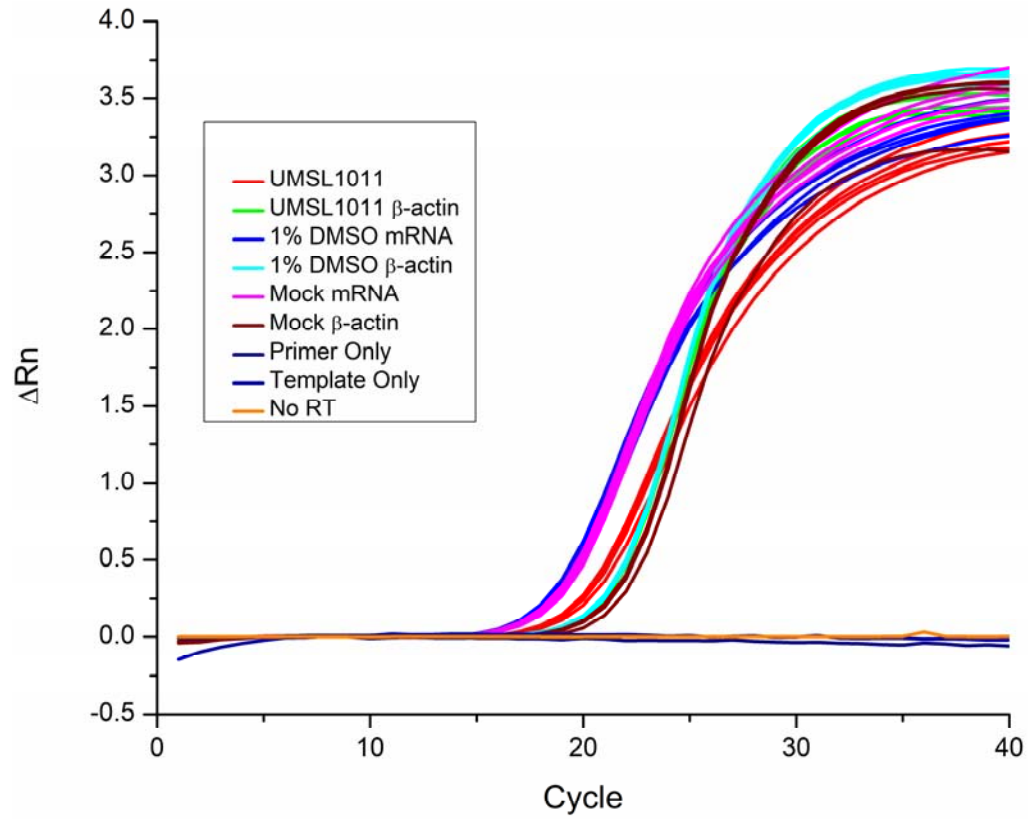

**Figure S1** Amplification plots of the qPCR in the minigenome assays in Figure 6. This illustrates that the controls do not have any amplification even when compared to the experimental conditions.

## Polyamide Characterization

### UMSL1013 Im-Py-Py-Py-γ-Py-Py-Im-Py-β-Dp (3 TFA):

$^1\text{H}$  NMR (600 MHz, DMSO- $d_6$ ) being obtained now.

HRMS (ESI) calculated for  $\text{C}_{58}\text{H}_{71}\text{N}_{21}\text{O}_{10}$   $[\text{MH}]^+$ , 1221.5684, found, 1221.5702.

Reverse Phase HPLC purity (trace shown): 94%.

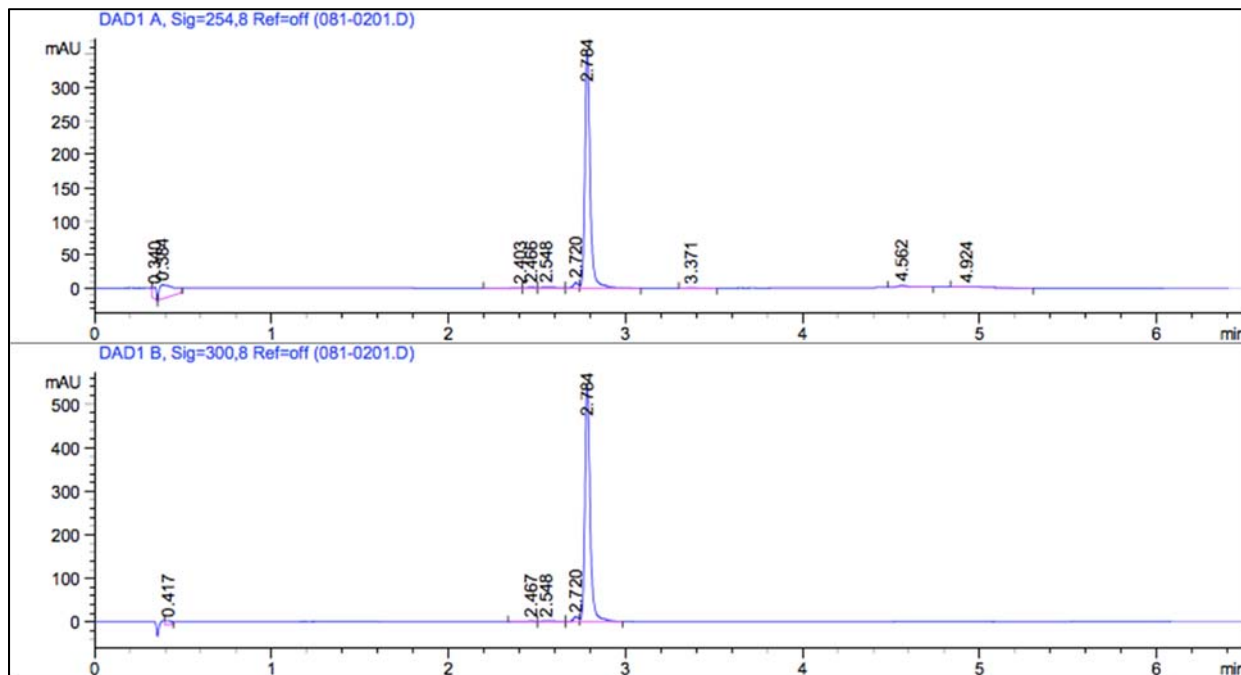

### UMSL2082 Im-Im-Py-γ-Py-Py-Py-β-Ta (4 TFA):

$^1\text{H}$  NMR (600 MHz, DMSO- $d_6$ )  $\delta$  = 7.54 (s, 1 H), 7.42 (s, 1 H), 7.20 -7.18 (dd, 1 H), 7.13 (s, 1 H), 7.07 (d, 1 H), 7.01 (s, 1 H), 6.96 (d, 1 H), 6.85-6.84 (m, 2 H), 3.98-3.97 (m, 7 H), 3.80-3.77 (m, 14 H), 3.48 (19 H,  $\text{H}_2\text{O}$ ), 3.37-3.35 (m, 3 H), 3.20-2.99 (m, 12 H), 2.84-2.81 (m, 3 H), 2.73-2.71 (s, 4 H), 2.35-2.32 (t, 2 H), 2.27-2.25 (t, 2 H), 1.90-1.86 (m, 3 H), 1.79-1.73 (m, 5 H).

HRMS (ESI) calculated for  $\text{C}_{48}\text{H}_{64}\text{N}_{18}\text{O}_8$   $[\text{M}]^+$ , 1020.5154, found, 1020.5101.

Reverse Phase HPLC purity (trace shown): 98%.

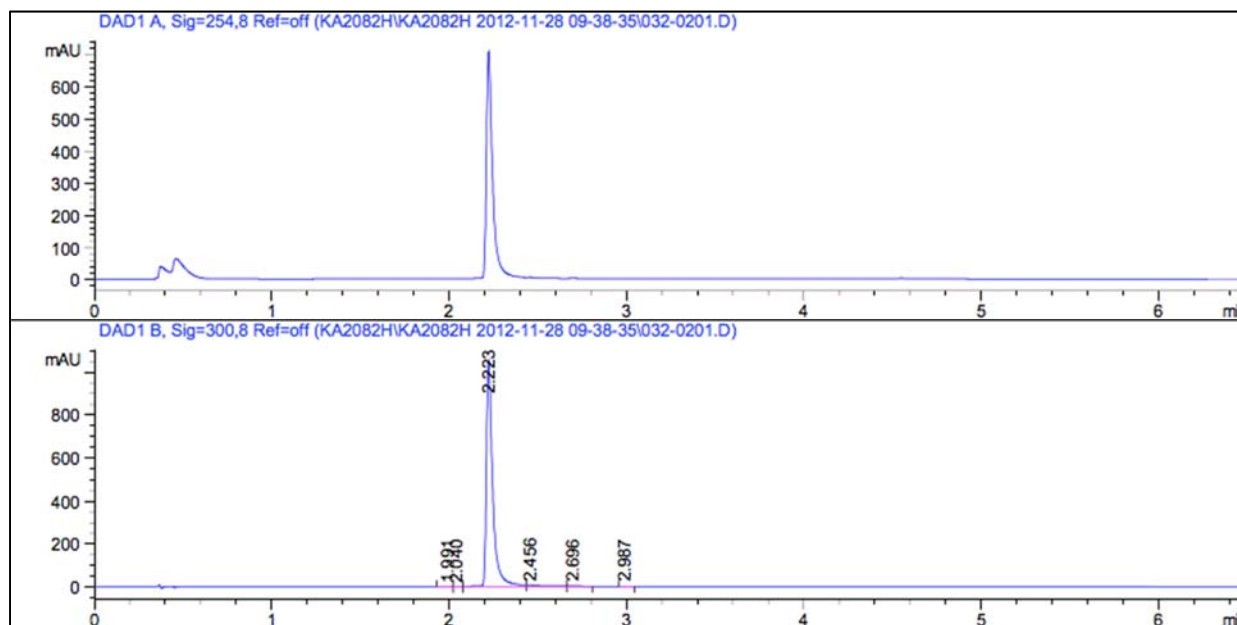

HP
